# Supplementary material for: Dual Effect of Rosuvastatin on Glucose Homeostasis Through Improved Insulin Sensitivity and Reduced Insulin Secretion
Source: PubMed Central journal article supplement — eBioMedicine. 2016 Jul 9;10:185–94. doi: 10.1016/j.ebiom.2016.07.007 (PMC5006666; doi:10.1016/j.ebiom.2016.07.007), 2016-07-09
Supplement: mmc1.pdf [file mmc1.pdf]

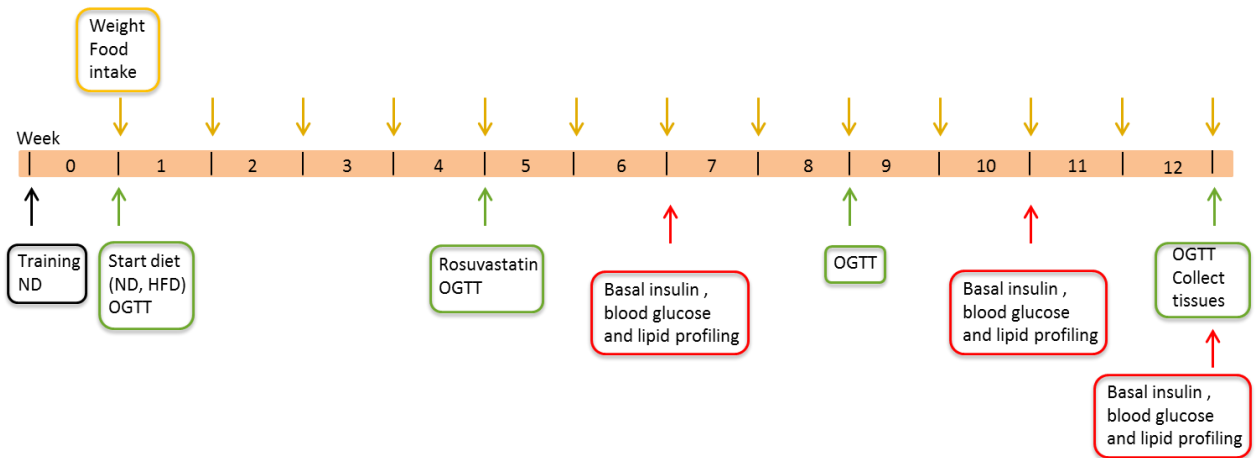

**Figure S1. Description of the Study design.** Yellow arrows – measurement of weight and food and water intake. Black arrow – indicate start of diet and treatment as indicated as well as time for OGTT (oral glucose tolerance test) and termination of the in vivo study. Red arrows- blood samples to measure lipids. ND-normal diet, ND\_Ros-normal diet with rosuvastatin, HFD-high fat diet, HFD\_Ros- high fat diet with rosuvastatin.

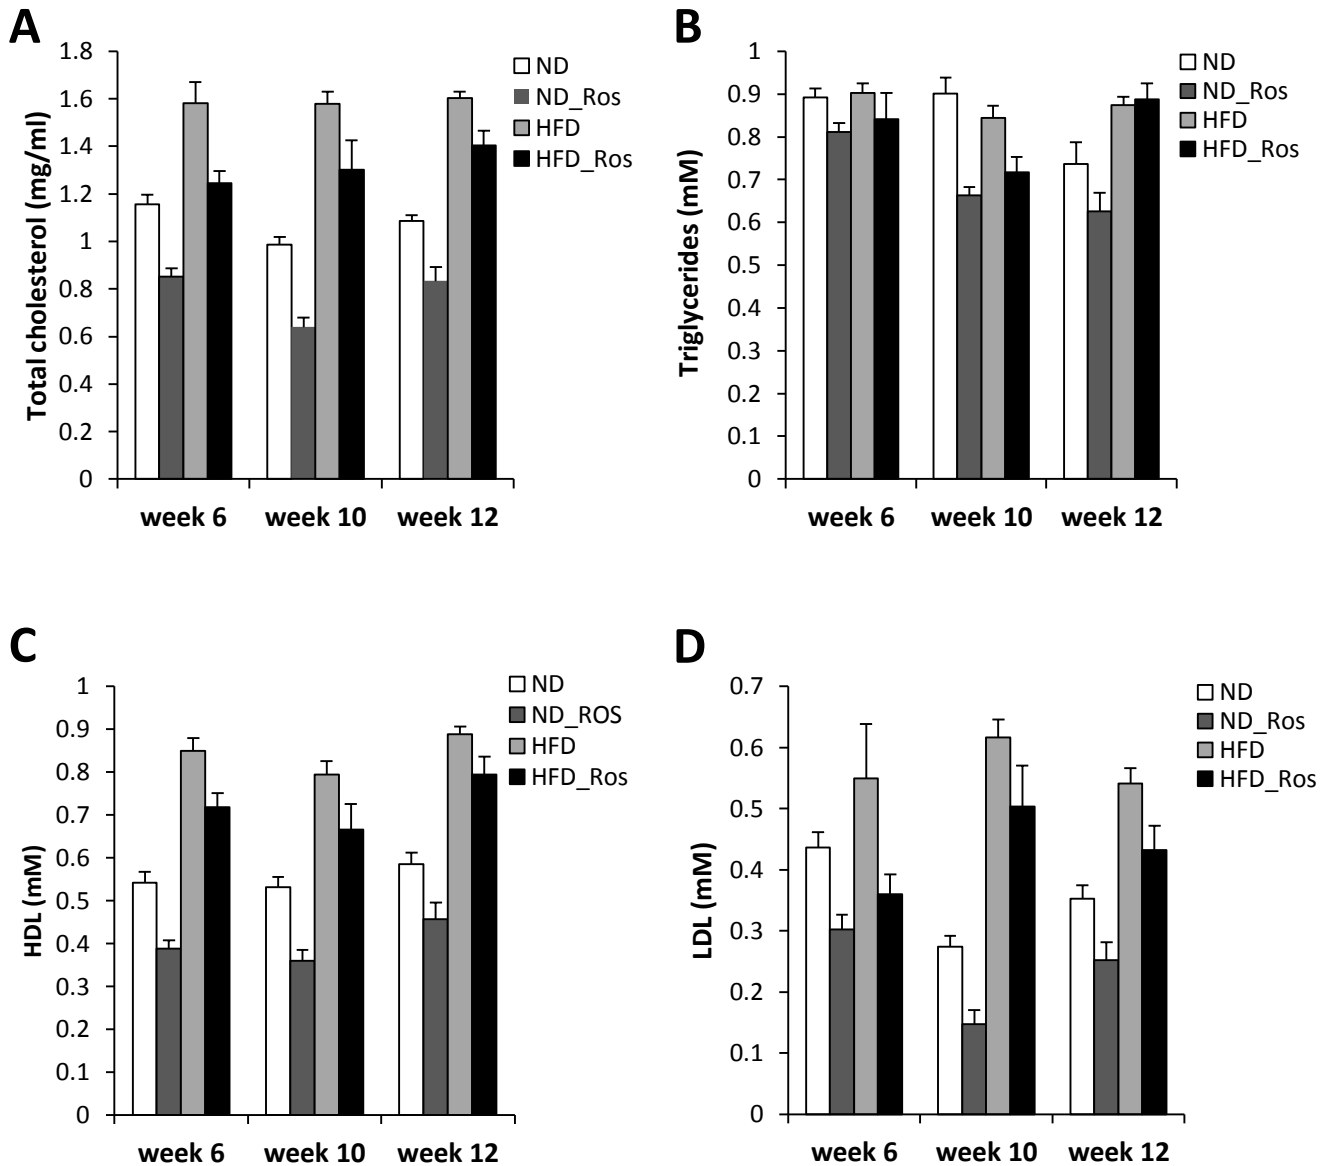

**Figure S2. Measurements of total cholesterol, triglycerides and HDL and estimates of LDL.** (A) Total cholesterol measured in blood from ND, ND\_Ros, HFD and HFD\_Ros mice as indicated. All values HFD vs ND, ND\_Ros vs ND and HFD\_Ros vs HFD has  $p < 0.001$  except 6 week HFD\_Ros vs HFD where  $p < 0.02$ . (B) As in A but triglycerides were. N:S HFD vs ND;  $p < 0.01$  ND\_Ros vs ND and HFD\_Ros vs HFD except 12 week ND\_Ros vs ND where  $p = 0.06$ . (C) As in A, but HDL was measured.  $P < 0.05$  HFD vs ND,  $p < 0.01$  ND\_Ros vs ND and  $p < 0.05$  HFD\_Ros vs HFD. N=13-15 mice.

**A**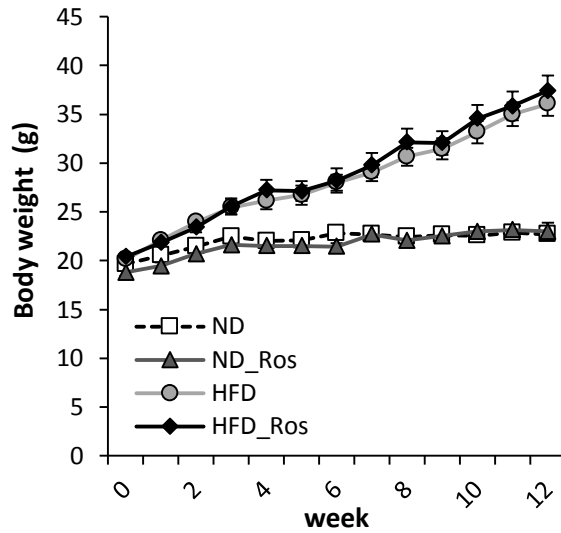**B**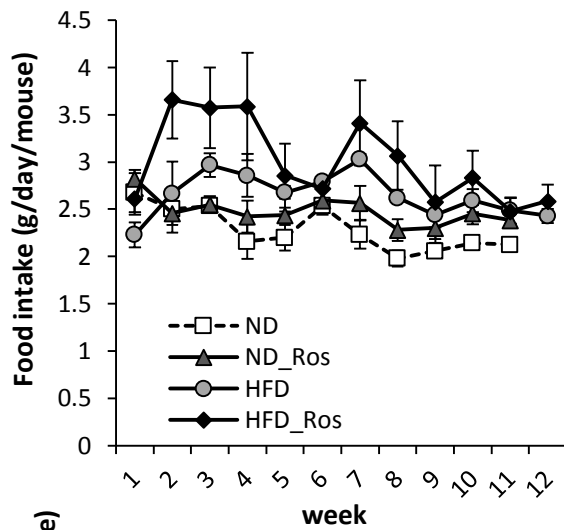**C**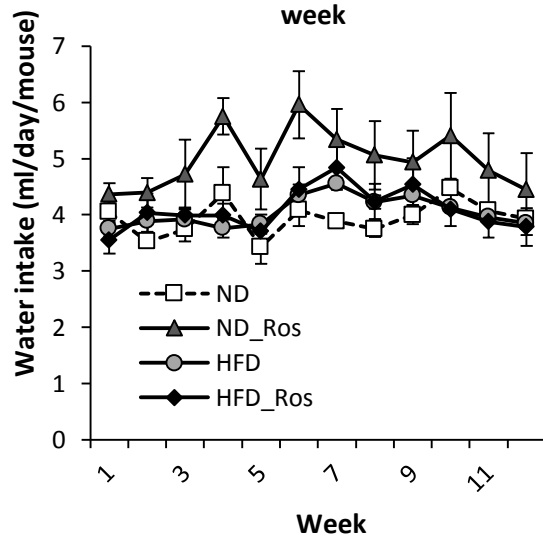**Figure S3. Effect of rosuvastatin on body weight, food and water intake**

Mice were fed normal diet or HFD for 4 week and then continued on respective diets with or without rosuvastatin in the drinking water for 8 week. A) Weight gain, B) food intake and C) water intake were measured every week throughout the study. N=13-15 mice.

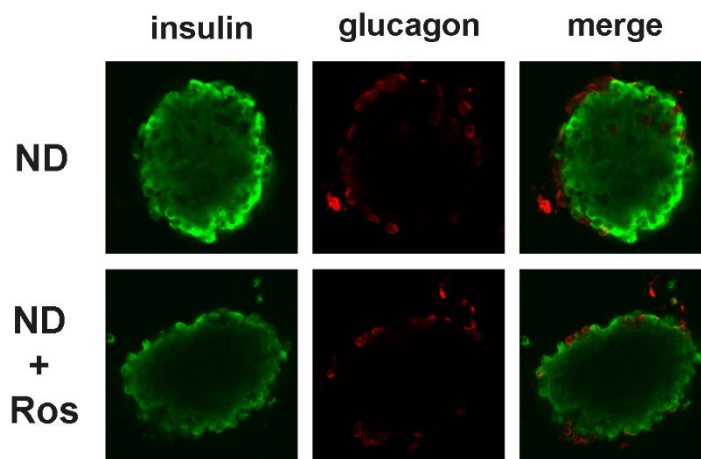

**Figure S4. Confocal images of insulin and glucagon staining in islet from ND mice.** Insulin (green) and glucagon (red) staining in an islet from a mice on ND in the absence (top) and presence (bottom) of rosuvastatin treatment. Representative image of N=12-14 islets in each group.

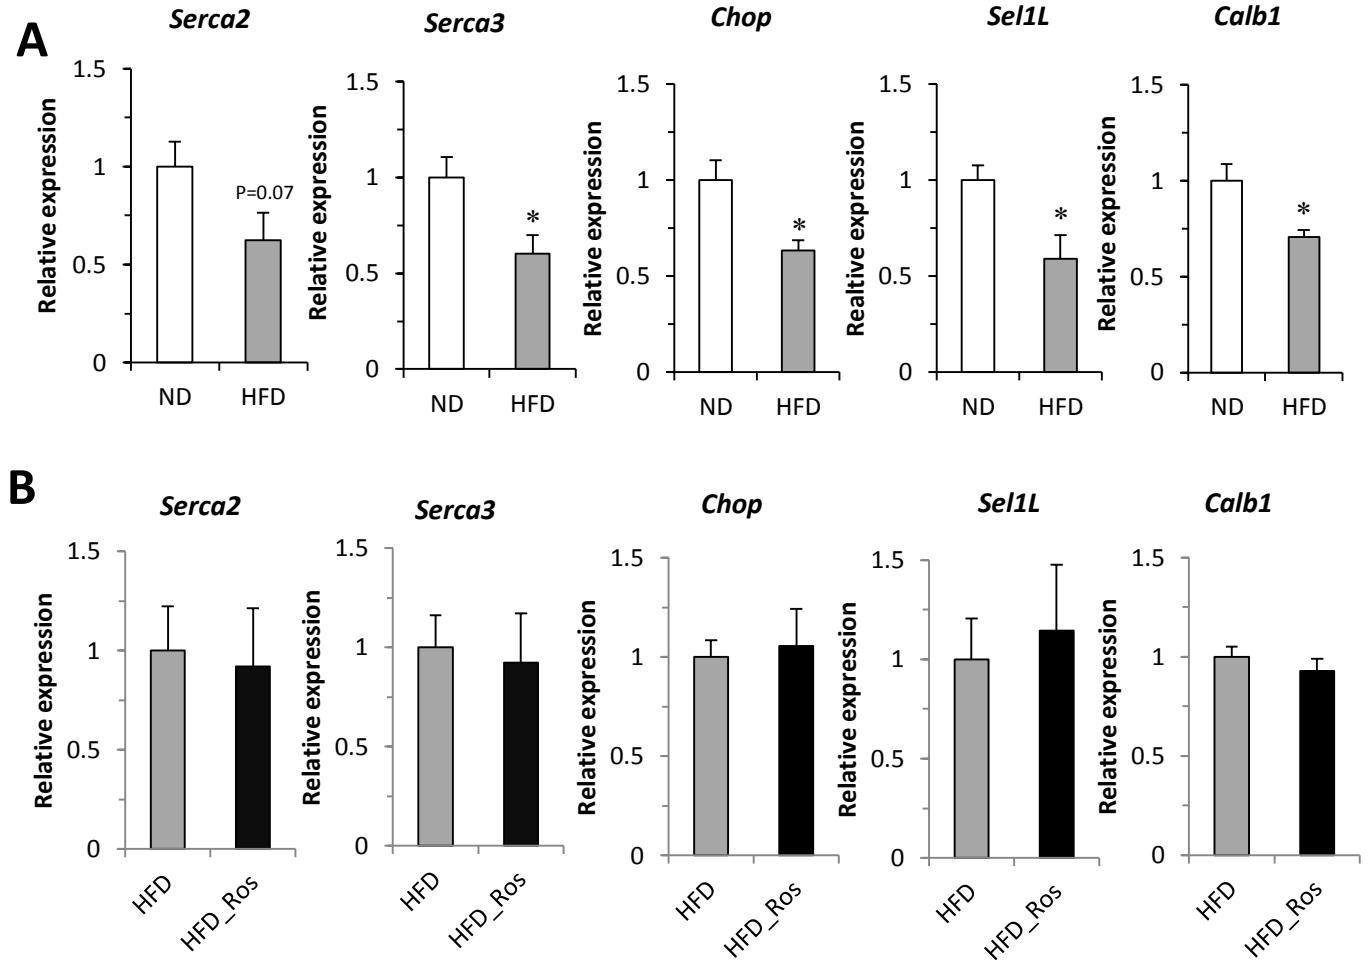

**Figure S5. Expression of ER and Ca<sup>2+</sup> associated proteins in islets of ND and HFD mice.**

(A) Expression of SERCA2, SERCA3, Sel1L, CHOP and Calb1 in islet from mice on HFD vs ND.

\*p<0.05 HFD vs ND. (B) As in A, but comparing the expression in islets from HFD mice with and without Rosuvastatin. \*p<0.05 HFD\_Ros vs HFD.

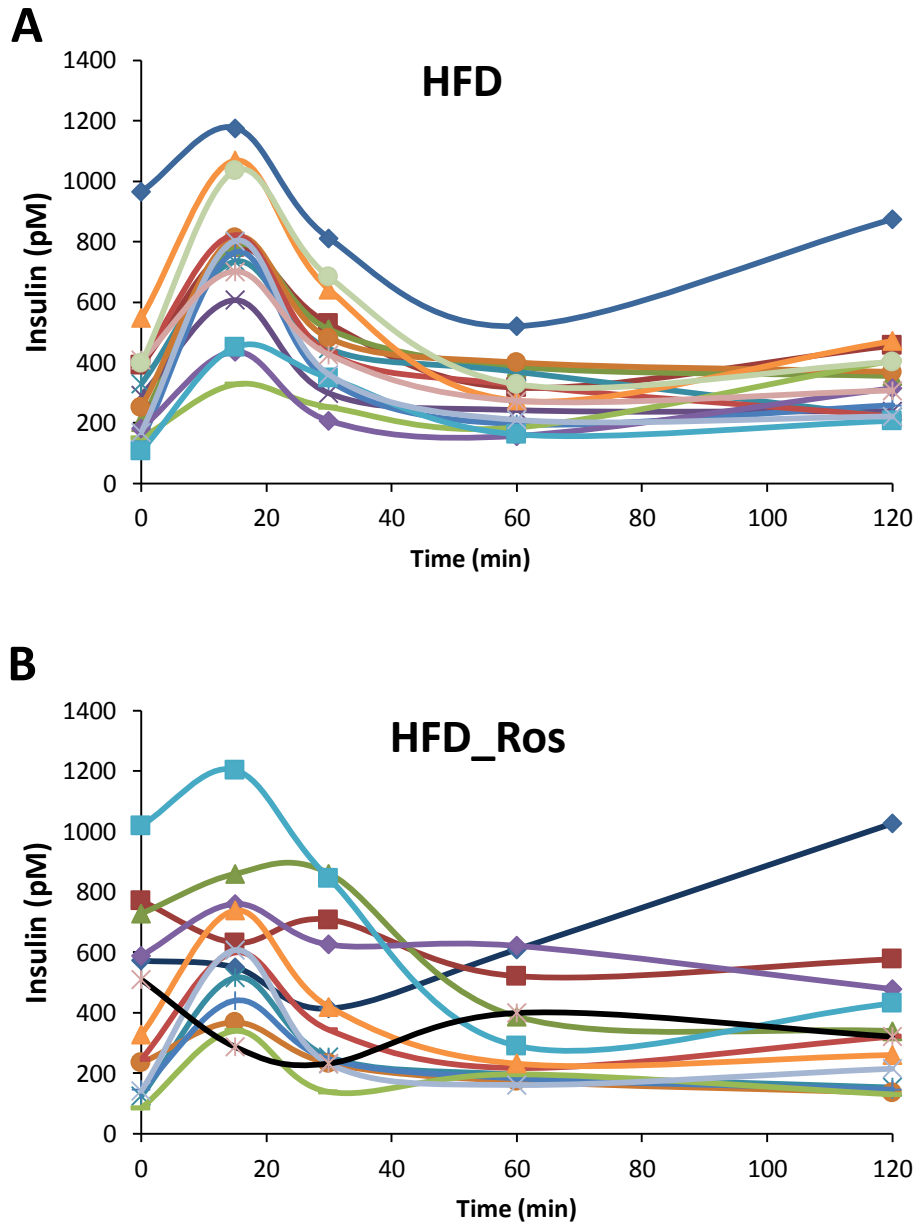

**Figure S6. Insulin response during OGTT in HFD mice with or without rosuvastatin treatment.** (A) All individual insulin responses during OGTT in HFD mice. (B) All individual insulin responses during OGTT in HFD rosuvastatin mice. Notice the variable responses in the HFD\_Ros group.

| Parameter | $A_d$<br>Initial dip area<br>(AU) |      | $A_t$<br>Total area<br>under graph<br>(AU) |            | Frequency of<br>2nd phase<br>oscillations<br>(peaks/min) |      | $C_0$<br>Fura2<br>(340/380) |       | $D_0$ - Delay<br>response to<br>16.7mM<br>glucose (min) |      | $D_1$ - Delay<br>response to<br>2.8mM glucose<br>(min) |      |
|-----------|-----------------------------------|------|--------------------------------------------|------------|----------------------------------------------------------|------|-----------------------------|-------|---------------------------------------------------------|------|--------------------------------------------------------|------|
|           | Control                           | RS   | Control                                    | RS         | Control                                                  | RS   | Control                     | RS    | Control                                                 | RS   | Control                                                | RS   |
| Mean      | 3938                              | 2386 | 18707<br>3                                 | 23914<br>6 | 1.05                                                     | 1.07 | 0.030                       | 0.024 | 4.11                                                    | 6.43 | 1.61                                                   | 2.25 |
| SEM       | 234                               | 229  | 9211                                       | 21426      | 0.31                                                     | 0.20 | 0.001                       | 0.001 | 0.19                                                    | 0.34 | 0.12                                                   | 0.21 |
| p-value   | 2.30E-05                          |      | 0.018                                      |            | 0.96                                                     |      | 7.74E-04                    |       | 8.90E-08                                                |      | 7.86E-03                                               |      |

| Parameter | $C_1$ - Fura2<br>(340/380) |      | $C_2$ - Fura2<br>(340/380) |      | $C_3$ - Fura2<br>(340/380) |      | $C_4$ - Fura2<br>(340/380) |      | $C_1/C_4$ |      |
|-----------|----------------------------|------|----------------------------|------|----------------------------|------|----------------------------|------|-----------|------|
|           | Control                    | RS   | Control                    | RS   | Control                    | RS   | Control                    | RS   | Control   | RS   |
| Mean      | 0.47                       | 0.52 | 0.44                       | 0.24 | 0.08                       | 0.16 | 0.39                       | 0.36 | 1.21      | 1.45 |
| SEM       | 0.03                       | 0.04 | 0.04                       | 0.02 | 0.01                       | 0.02 | 0.03                       | 0.03 | 0.04      | 0.05 |
| p-value   | 0.32                       |      | 2.03E-04                   |      | 2.01E-04                   |      | 0.42                       |      | 7.64E-04  |      |

**Supplementary Table 1 - Calcium Imaging of islets from C57BL/6 mice fed normal Chow diet and treated with Rosuvastatin for 8 weeks**

**Summary Statistics :**  $A_d$  – Area of initial dip in calcium before the first calcium peak (below baseline);  $A_t$  – Total area under the graph;  $C_0$  – height of dip in calcium before the first calcium peak;  $D_0$  - delay response to 16.7 mM glucose;  $D_1$  – delay response to 2.8 mM glucose;  $C_1$  – height of first calcium peak (from baseline) ;  $C_2$  - measure of  $Ca^{2+}$  exit between 1<sup>st</sup> and 2<sup>nd</sup> Phase (difference between top of first peak and the following trough);  $C_3$  – difference between the top of the first peak and the midpoint of 2<sup>nd</sup> phase oscillations;  $C_4$  – mean height of 2<sup>nd</sup> phase oscillation (from baseline).
